# Supplementary material
Source: Springer Nature journal article supplement (https://www.springermedizin.de/resource/supplementary/12943_2011_1002_MOESM13_ESM.pdf/9552064)

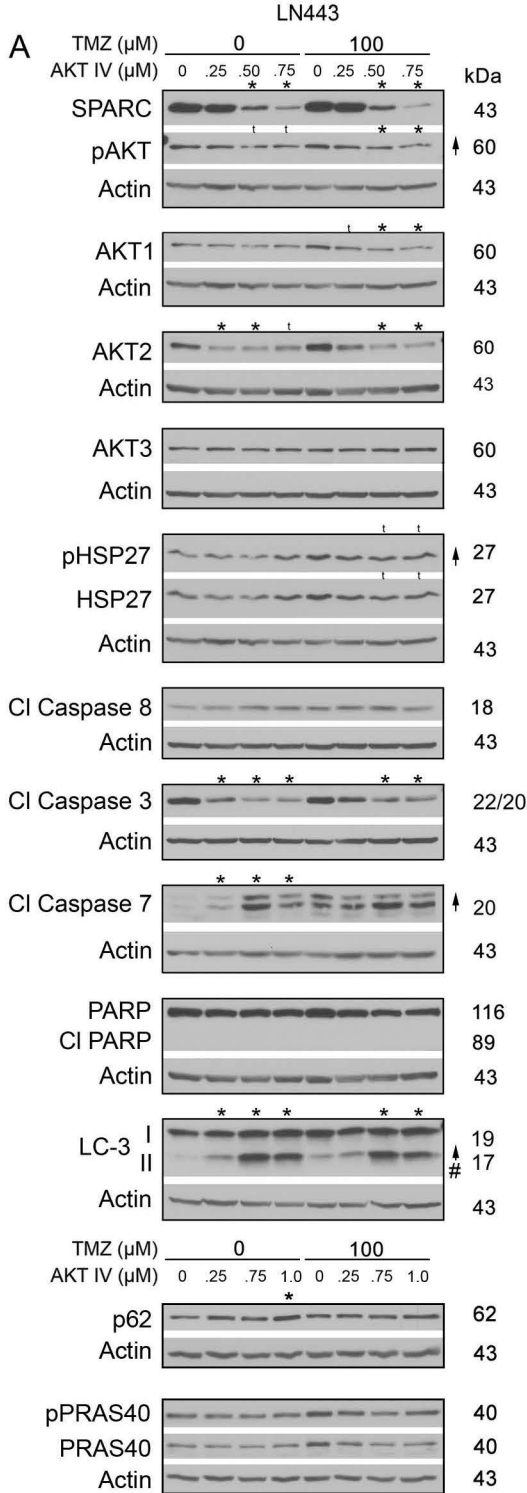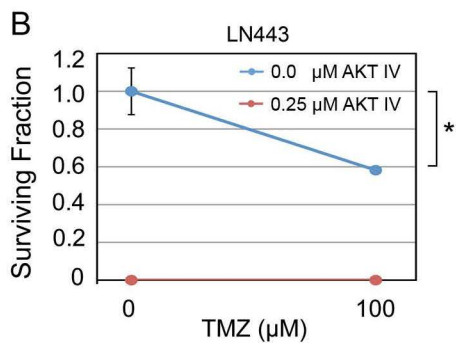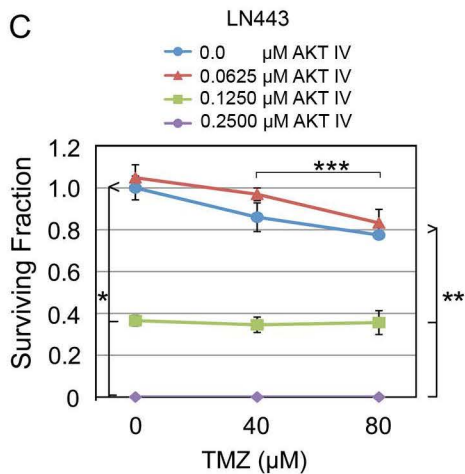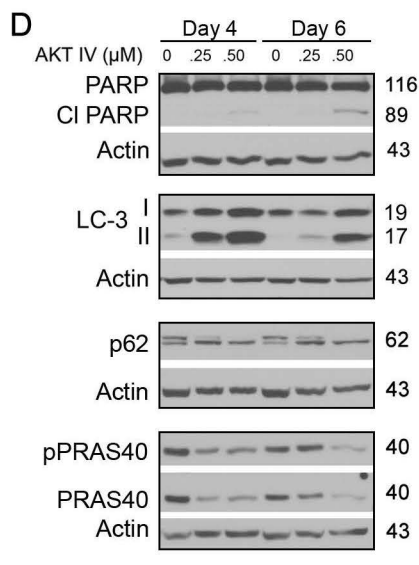

Supplement: MOESM13 [file 9552064]
